# Supplementary material for: Coordination-driven reversible surfaces with site-specifically immobilized nanobody for dynamic cancer cell capture and release
Source: Royal Society of Chemistry journal article supplement (doi:10.1039/d0tb00574f), 2020-01-01
Supplement: d0tb00574f1.pdf [file d0tb00574f1.pdf]

## Supporting Information

Coordination-Driven Reversible Surfaces with Site-Specifically immobilized  
Nanobody for Dynamic Cancer Cell Capture and Release

Lulu Han, Ruilian Peng, Wenning Jiang, Ting Xu, Chong Zhang, Kaidi Chen, Yixin  
Zhang, Haiyuan Song and Lingyun Jia\*

Liaoning Key Laboratory of Molecular Recognition and Imaging, School of  
Bioengineering, Dalian University of Technology, Dalian 116023, P. R. China

E-mail: lyj81@dlut.edu.cn

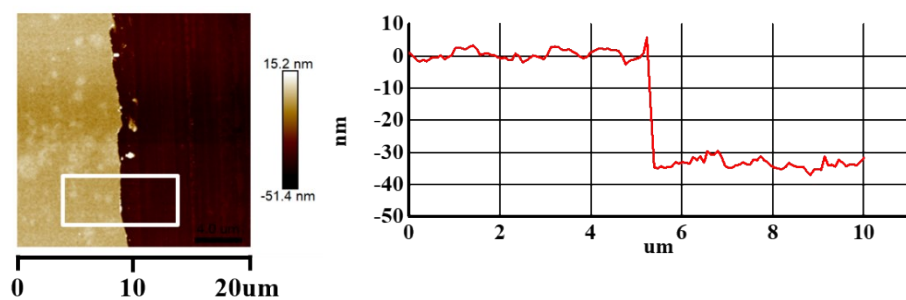

Figure S1. AFM image (right) of a PHEMA surface with a thickness profile (left). The thickness of the PHEMA brush characterized by AFM was  $30 \pm 2$  nm, close to that measured by ellipsometry.

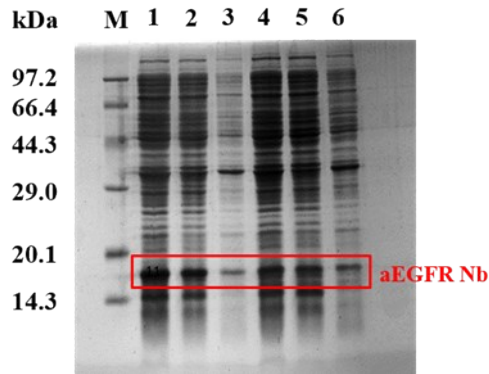

Figure S2. Expression and soluble detection of His-tagged anti-EGFR nanobody (aEGFR Nb) in *E. coli* Shuffle T7. Lane M, protein molecular weight markers; Lane 1, IPTG-induced total bacterial protein; Lane 2, IPTG-induced supernatant after the cell disruption and centrifugation; Lane 3, IPTG-induced precipitate after the cell disruption and centrifugation; Lane 4, uninduced total bacterial protein; Lane 5, uninduced supernatant after the cell disruption and centrifugation; Lane 6, uninduced precipitate after the cell disruption and centrifugation.

Isopropyl  $\beta$ -D-1-Thiogalactopyranoside (IPTG)-induced and non-IPTG-induced bacteria were collected separately. After sonication and subsequent centrifugation, electrophoresis samples were made from the collected bacteria, and centrifugated supernatant and precipitate, receptively, and evaluated under SDS-polyacrylamide gel electrophoresis (SDS-PAGE). The expression of IPTG-inducted anti-EGFR nanobody (aEGFR Nb) was exhibited with a clear band at the theoretical molecular weight of 15 kDa. Moreover, the soluble aEGFR Nb was mainly present in the supernatant (Figure S2 lane 2 and lane 5).

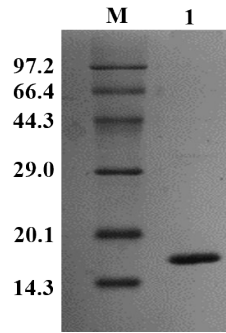

Figure S3. SDS image of purified His-tagged anti-EGFR nanobody (aEGFR Nb). Lane M, protein molecular weight markers; Lane 1, purified His-tagged aEGFR Nb. The resulting aEGFR Nb with a yield of 130 mg L<sup>-1</sup> possessed a purity of more than 98%.

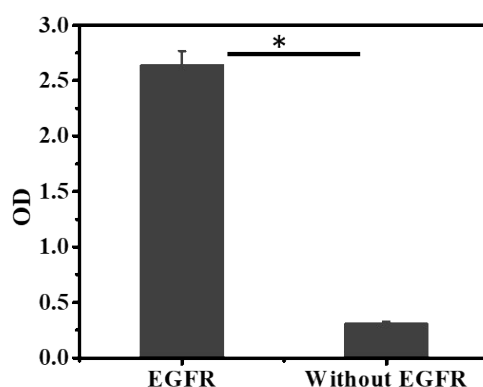

Figure S4. Binding activity of aEGFR Nb. Data are presented as mean  $\pm$  standard deviation,  $n = 3$ . \* $p < 0.05$ .

The antigen-binding activities of the aEGFR Nb were detected by a cellular ELISA. First, 100  $\mu\text{L}$  of A431(EGFR+) cell suspensions ( $1 \times 10^4$  cells  $\text{mL}^{-1}$ ) were added to each well of a 96-well cell culture plate, and cultured for 12 h at 37°C in 5%  $\text{CO}_2$  followed by washing three times with PBS. Afterward, 125  $\mu\text{L}$  of 4% paraformaldehyde was added into each well for 30 min to fix the cells. After three washes with PBS, 200  $\mu\text{L}$  of 5% (w/v) skim milk powder was added to block cells for 1 h at 37°C. Then 200  $\mu\text{L}$  of aEGFR Nb ( $30 \mu\text{g mL}^{-1}$ ) was used to incubate cells for 1 h at 37°C. Subsequently, the cells were incubated with a primary antibody solution (Anti-6 $\times$ His antibody, diluted 1:2000 in PBS, Sangon Biotech, China) for 1 h at 37°C, and then stained with a secondary antibody (HRP-conjugated Goat Anti-Mouse IgG, diluted 1:2000 in PBS, Sangon Biotech, China) for 1 h at 37°C. Finally, after incubation with 200  $\mu\text{L}$  of TMB working solution in the dark for 20 min, 50  $\mu\text{L}$  of stop solution was added and OD value of the resulting solution in the well was measured under a microplate reader (TECAN, Switzerland) at 450 nm.

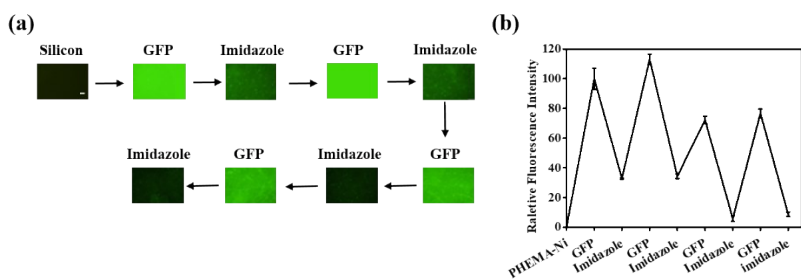

Figure S5. Site-specific immobilization and reversible release of His-tagged enhanced green fluorescent protein (EGFP). (a) Fluorescence images of the His-tagged EGFP immobilization and released on the PHEMA-Ni<sup>2+</sup> surfaces *via* the treatment with a competitive agent imidazole. Scale bar = 200  $\mu$ m. (b) Relative fluorescence intensity of different surfaces of site-specific immobilization and reversible release of His-tagged EGFP analyzed with ImageJ software. Prior to the normalization, the fluorescence intensity of the background PHEMA-Ni<sup>2+</sup> surface was subtracted (that of the first immobilization is set as 100%). Data are presented as mean  $\pm$  SD, n = 3.

His-tagged enhanced green fluorescent protein (EGFP, a gift from Li Xu Associated Professor in Dalian University of Technology, China) was used as a model protein to investigate the process of site-specific immobilization and reversible release of His-tagged protein on the PHEMA-Ni<sup>2+</sup> surfaces. After incubation of the His-tagged EGFP solution (500  $\mu$ g mL<sup>-1</sup> in PBS) for 2 h, green fluorescence was observed on the PHEMA-Ni<sup>2+</sup> surfaces (Figure S5a), indicating the successful immobilization of His-tagged EGFP. After the treatment of the imidazole solution (200 mM in PBS, 200 r min<sup>-1</sup> for 1 h), the fluorescence intensity decreased significantly, showing the release of His-tagged EGFP. After the repeated immobilization-releasing process for three times, the His-tagged EGFP could still reversibly immobilize onto and release from the PHEMA-Ni<sup>2+</sup> surfaces (Figure S5b).

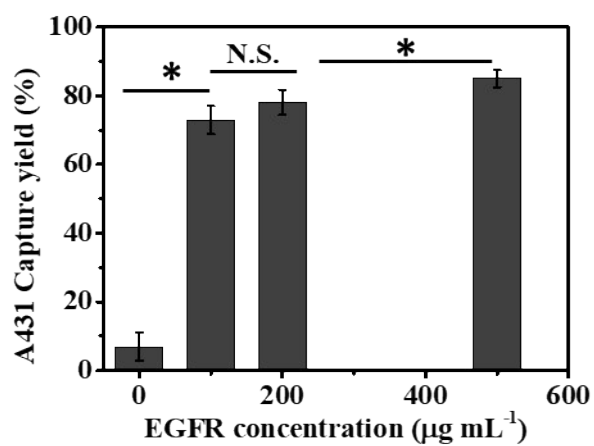

Figure S6. Capture yield of A431 cells as a function of immobilization concentration of aEGFR Nb. Different concentration of nanobody were immobilized to the PHEMA- $\text{Ni}^{2+}$ . Data are presented as mean  $\pm$  SD, n = 3.

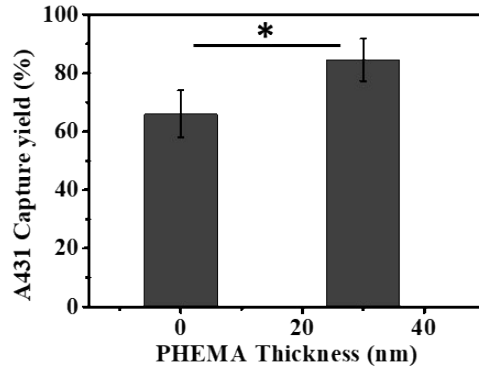

Figure S7. Influence of aEGFR Nb linker (w/o PHEMA brushes) on capture yield of A431 cells. PHEMA brushes with a thickness of 0 nm means direct immobilization of aEGFR Nb on the NTA-Ni<sup>2+</sup>-modified silica surfaces. Data are presented as mean  $\pm$  SD, n = 3.

Immobilization of aEGFR Nb on the NTA-Ni<sup>2+</sup>-modified silica surfaces: First, APTES-modified silica surfaces were activated with CDI (20 mM in acetone) for 3 h at 25°C. After washes in acetone and water, the surfaces were incubated in a pH 8.5 PBS containing the mixture of 5 mg mL<sup>-1</sup> NH<sub>2</sub>-NTA and 11.63 mg mL<sup>-1</sup> ethanolamine for 12 h. After washed with abundant water, the NTA-modified silica surfaces were placed into a NiCl<sub>2</sub> solution (100 mM in H<sub>2</sub>O) for 2 h at 37 °C, and then immersed in an aEGFR Nb PBS solution (500  $\mu$ g mL<sup>-1</sup>) for 2 h at 37°C.



Table S1 Amino acid sequence of His-tagged anti-EGFR nanobody

---

| Nanobody   | Amino acid sequence                       |
|------------|-------------------------------------------|
| His-tagged | AEFQVKLEESGGGSVQTGGSLRLTCAASGRTSRSYGMGW   |
| anti-EGFR  | FRQAPGKEREFEVSGISWRGDSTGYADSVKGRFTISRDNAK |
| nanobody   | NTVDLQMNSLKPEDTAIYYCAAAGSAWYGTLYEYDYW     |
|            | GQGTQVTVSSPRLCTPSRPRHHHHH                 |

---

Table S2 Molar ratios of surface elemental compositions obtained from XPS data

|           | %C 1s | %N 1s | %O 1s |
|-----------|-------|-------|-------|
| PHEMA     | 68.11 | –     | 31.89 |
| PHEMA-CDI | 62.71 | 10.95 | 26.35 |
